# Supplementary material for: Blood tryptase and thymic stromal lymphopoietin levels predict the risk of exacerbation in severe asthma
Source: Research Square preprint supplement (doi:10.21203/rs.3.rs-109575/v1), 2020-12-02
Supplement: Supplementary file 1 [file 358bf6beb74942c6d9ee16b8.docx]

**Blood tryptase and thymic stromal lymphopoietin levels predict the risk of exacerbation in severe asthma**

Hsin-Kuo Ko, Shih-Lung Cheng, Ching-Hsiung Lin, Sheng-Hao Lin, Yi-Han Hsiao, Kang-Cheng Su, Chong-Jen Yu, Hao-Chien Wang, Chau-Chyun Sheu, Kuo-Chin Chiu* , Diahn-Warng Perng*
